# Supplementary material for: Investigating the Impact of Sun/UV Protection and Ease of Skin Tanning on the Risk of Pseudoexfoliation Glaucoma: A Mendelian Randomization Study
Source: PubMed Central journal article supplement — Invest Ophthalmol Vis Sci. 2023 Oct 3;64(13):4. doi: 10.1167/iovs.64.13.4 (PMC10552876; doi:10.1167/iovs.64.13.4), 2023-10-03
Supplement: iovs-64-13-4_s001.pdf [file iovs-64-13-4_s001.pdf]

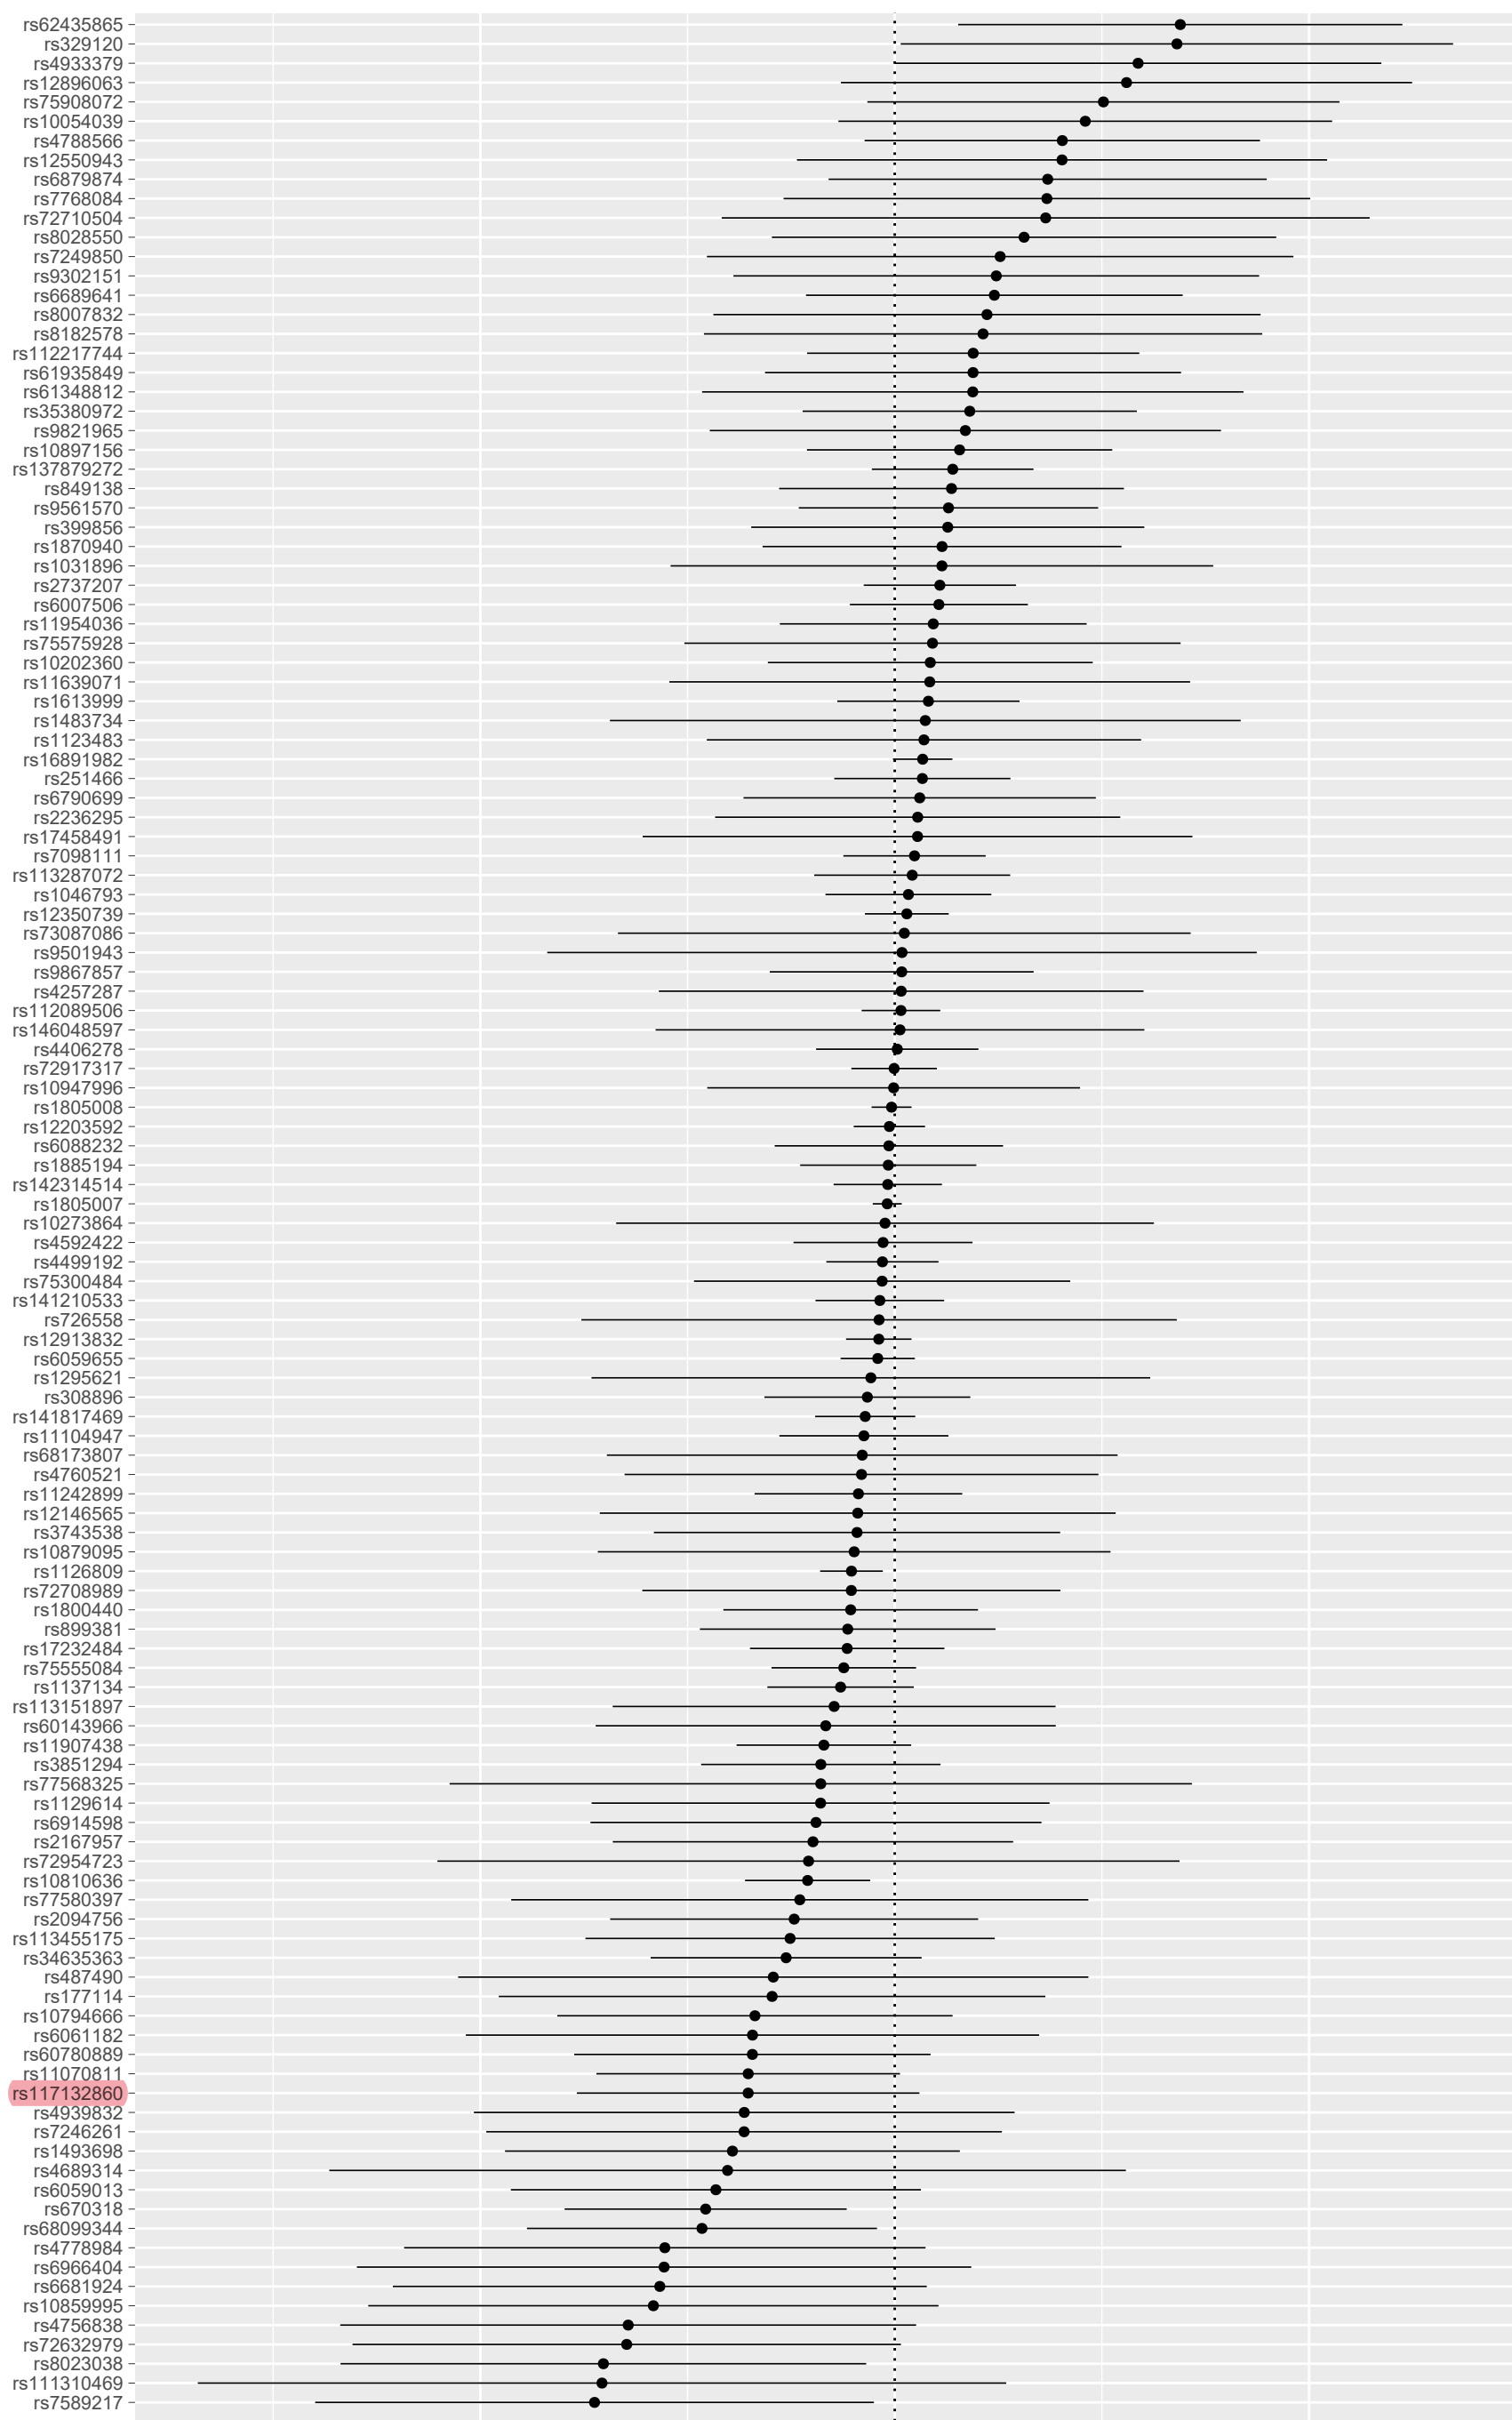

All - MR Egger  
 All - Inverse variance weighted

MR effect size for  
 'Ease of skin tanning || id:ukb-b-533' on 'Glaucoma, exfoliation || id:finn-b-H7\_GLAUCOMA\_XFG'
