# Supplementary figures and images for: Investigating the Impact of Sun/UV Protection and Ease of Skin Tanning on the Risk of Pseudoexfoliation Glaucoma: A Mendelian Randomization Study
Source: PubMed Central journal article supplement — Invest Ophthalmol Vis Sci. 2023 Oct 3;64(13):4. doi: 10.1167/iovs.64.13.4 (PMC10552876; doi:10.1167/iovs.64.13.4), 2023-10-03

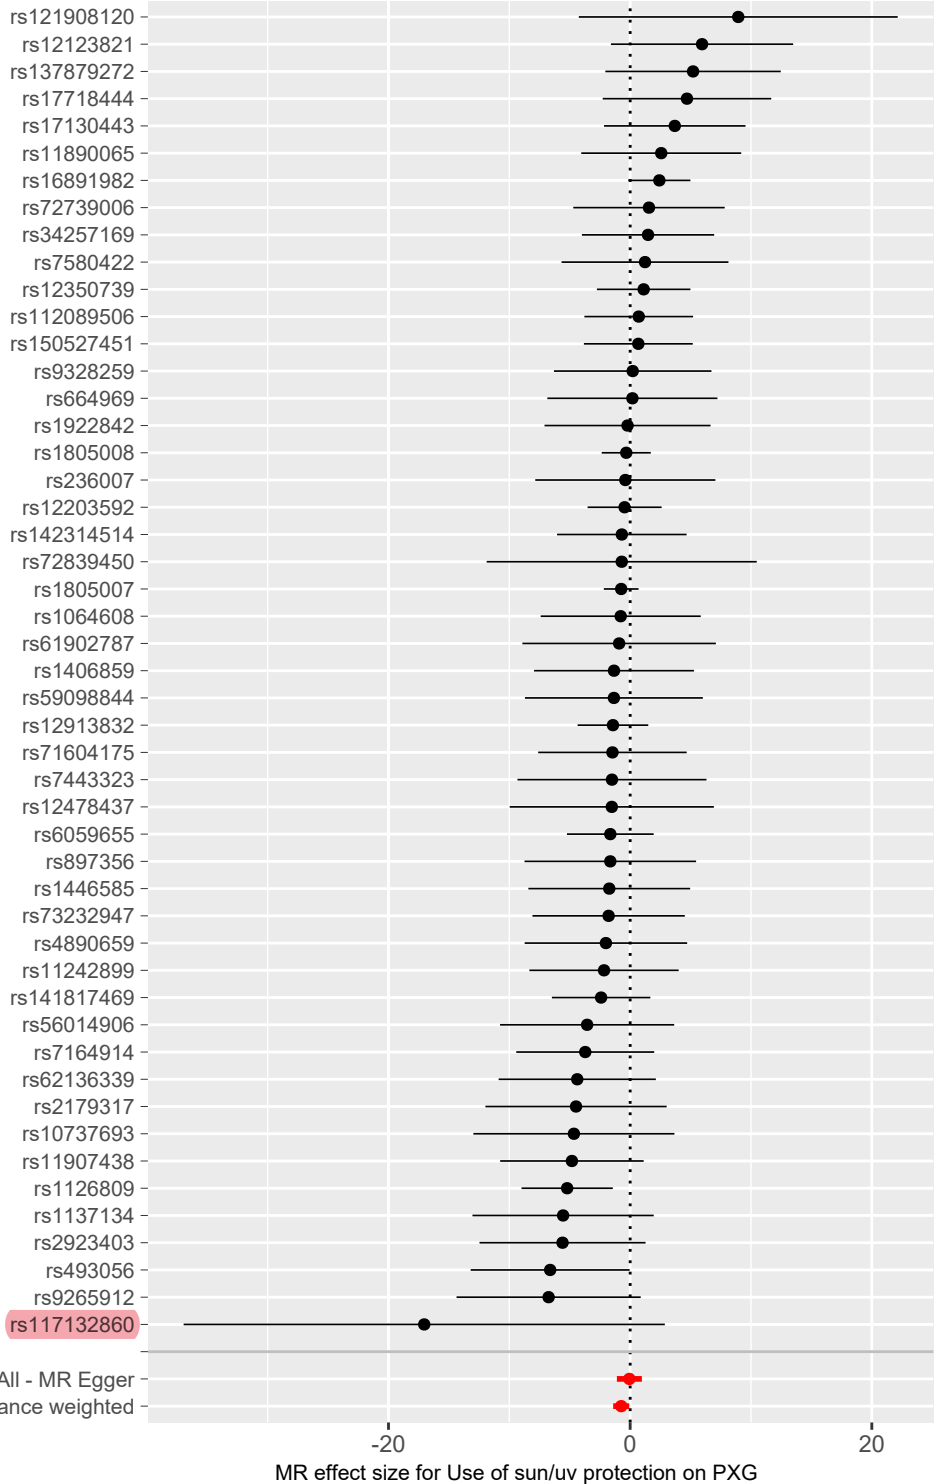

rs117132860

-20

20

MR effect size for Use of sun/uv protection on PXG

Supplement: iovs-64-13-4_s002.pdf [file iovs-64-13-4_s002.pdf]
